# Supplementary figures and images for: Feasibility and efficacy data from a ketogenic diet intervention in Alzheimer's disease
Source: PubMed Central journal article supplement — Alzheimers Dement (N Y). 2017 Dec 6;4:28–36. doi: 10.1016/j.trci.2017.11.002 (PMC6021549; doi:10.1016/j.trci.2017.11.002), 2017-12-06

**Figure e-1.** Recruitment and Participant Flow

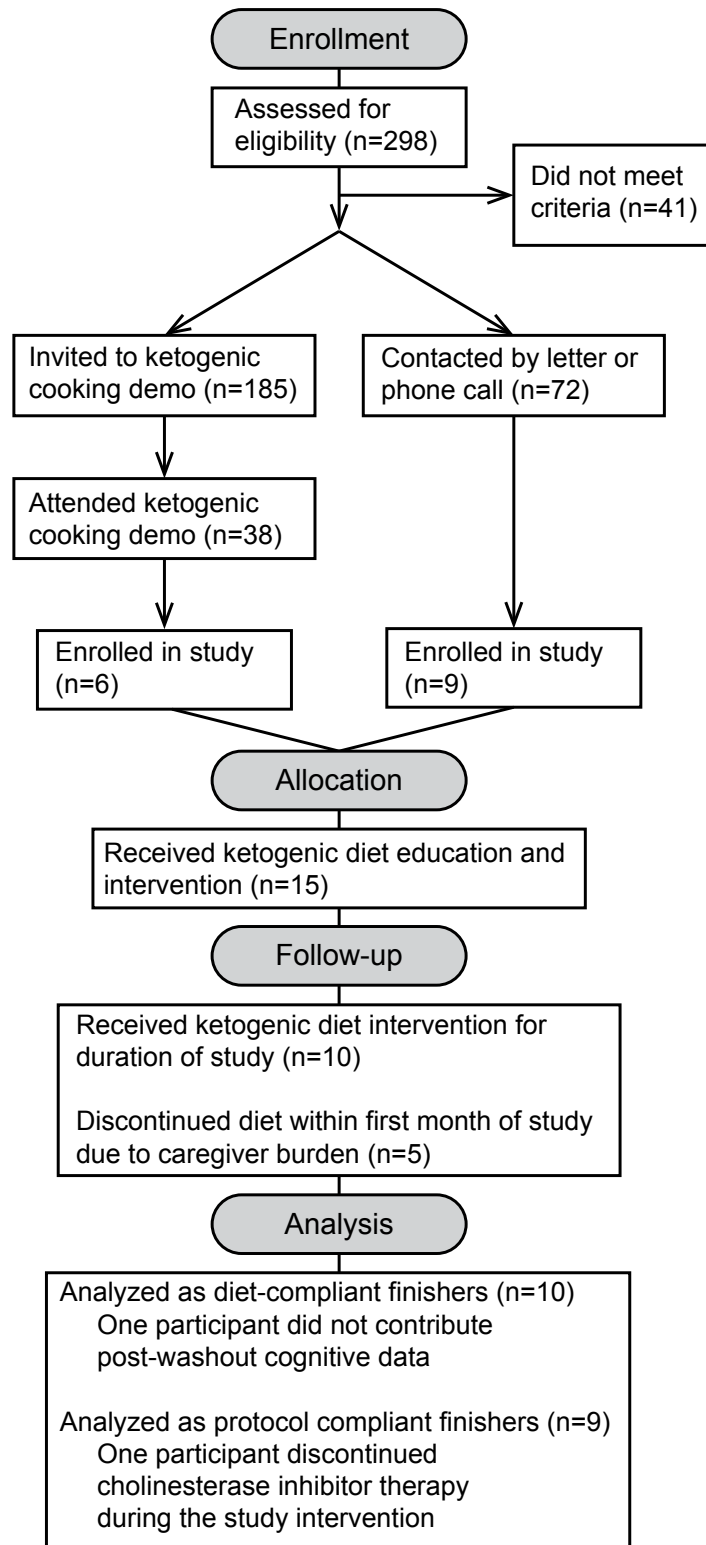

Supplement: mmc1.pdf [file mmc1.pdf]
